# Supplementary material for: Co-Doped Porous Carbon/Carbon Nanotube Heterostructures Derived from ZIF-L@ZIF-67 for Efficient Microwave Absorption
Source: MDPI journal article supplement (doi:10.3390/molecules29112426), 2024-05-21
Supplement: s1 [file s1]

## Supplementary Materials

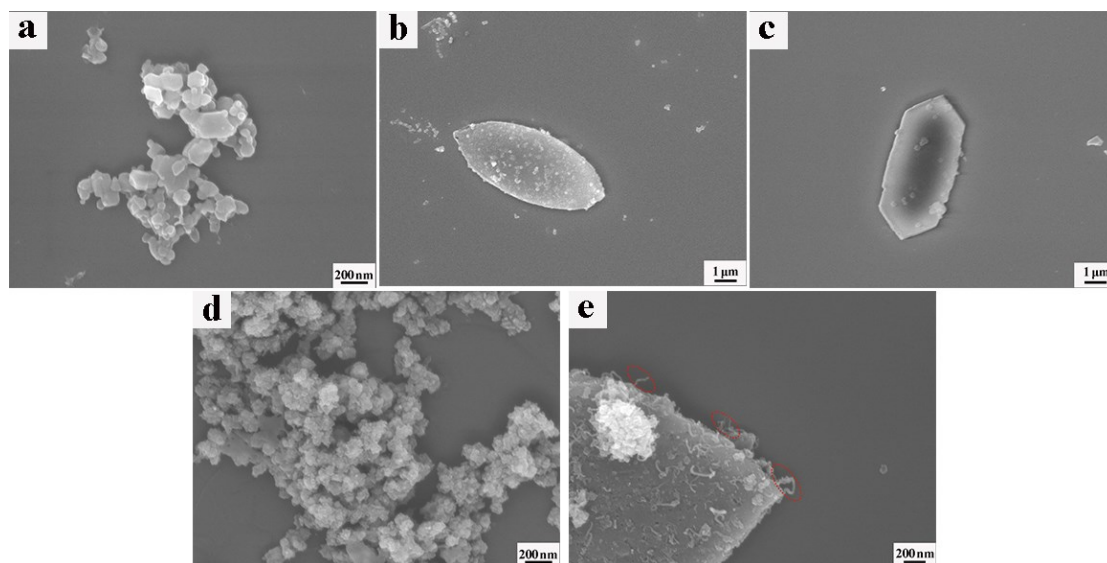

**Figure S1.** SEM of (a) ZIF-67 (b) ZIF-L@ZIF-67-1 (c) ZIF-L@ZIF-67-4 (d) Co/C (e) DPC/CNTs-4.

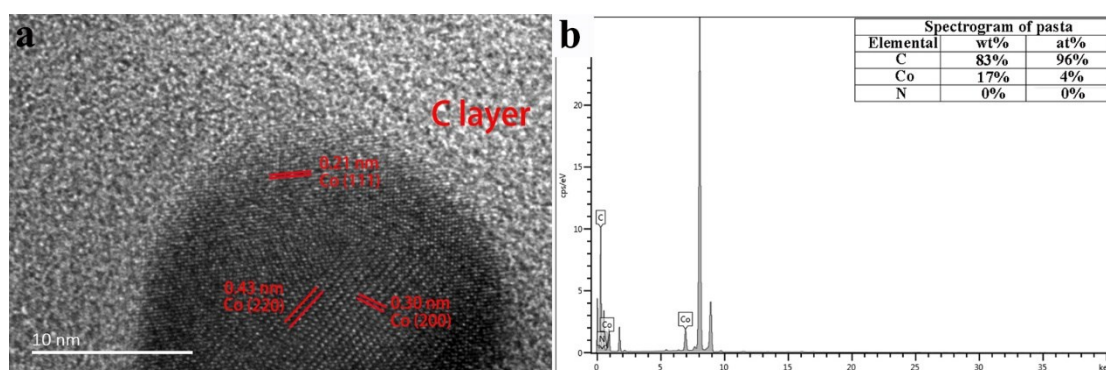

**Figure S2.** (a) HRTEM images of DPC/CNTs-2, (b) Elemental mapping of DPC/CNTs-2.

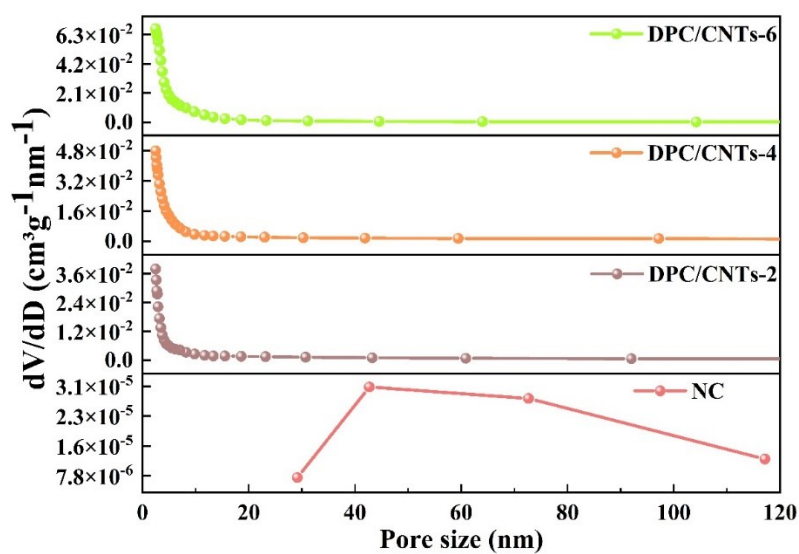

**Figure S3.** pore size distribution profiles of NC, DPC/CNTs-2, DPC/CNTs-4, DPC/CNTs-6.

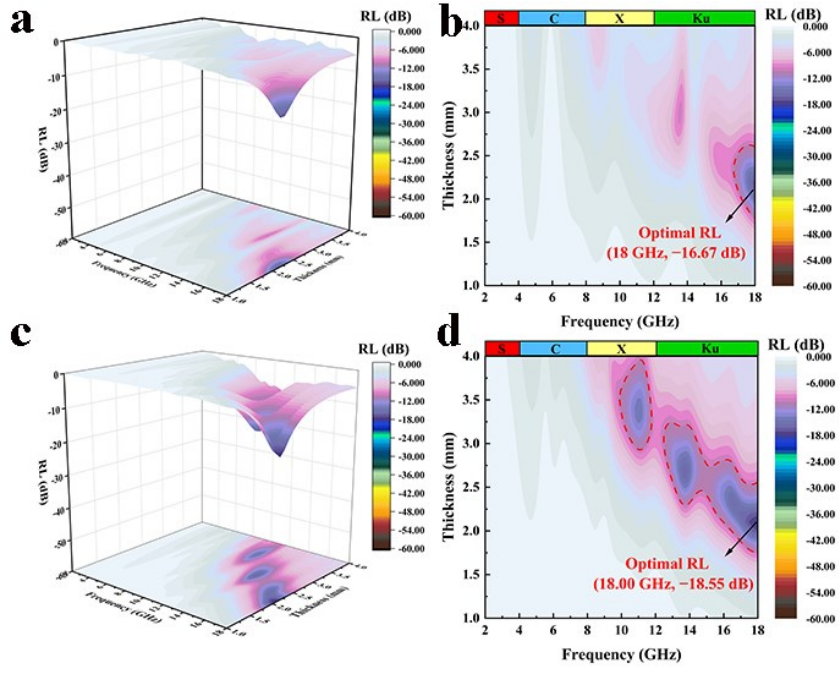

Figure S4. The RL and EAB values for (a,b) Co/C, (c,d) DPC/CNTs-1.

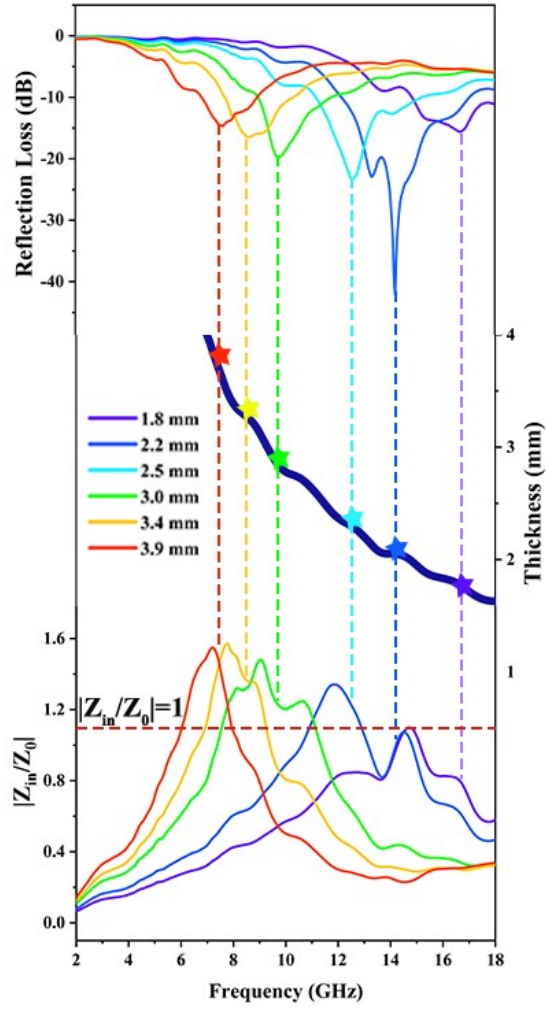

Figure S5.  $RL$ ,  $t_m$  and  $|Z_{in}/Z_0|$  vs  $f$  curves of DPC/CNTs-2.

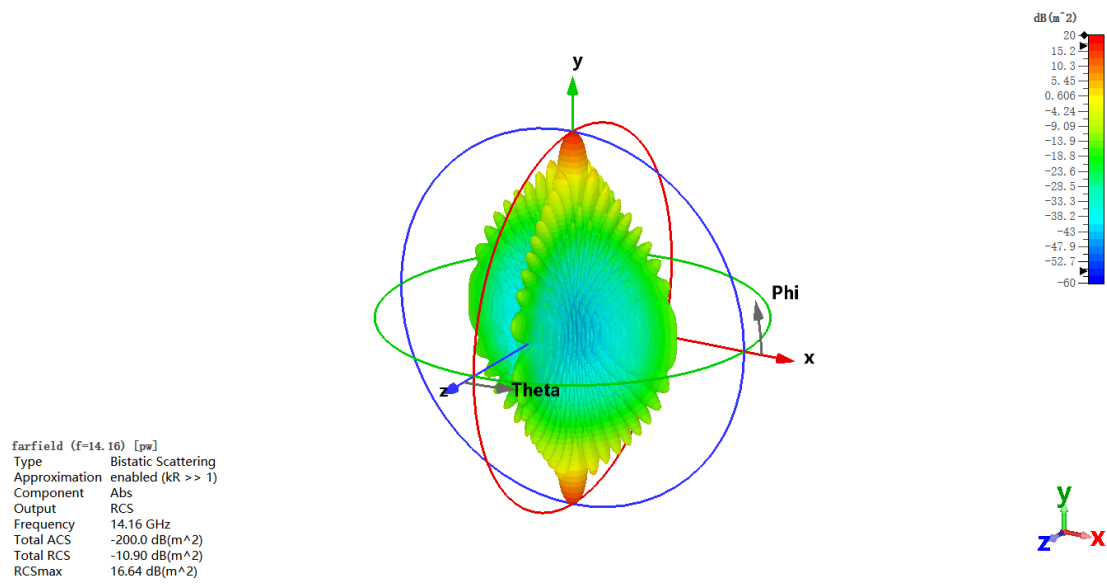

**Figure S6.** Simulation results based on far-field response of PEC.
